# Supplementary material for: A randomized controlled trial of an intervention to increase cultural diversity awareness of research mentors of undergraduate students
Source: PubMed Central journal article supplement — Sci Adv. 2023 May 24;9(21):eadf9705. doi: 10.1126/sciadv.adf9705 (PMC10208566; doi:10.1126/sciadv.adf9705), 2023-05-24

Supplementary Materials for

**A randomized controlled trial of an intervention to increase cultural diversity awareness of research mentors of undergraduate students**

Angela Byars-Winston *et al.*

Corresponding author: Angela Byars-Winston, [ambyars@wisc.edu](mailto:ambyars@wisc.edu)

*Sci. Adv.* **9**, eadf9705 (2023)  
DOI: 10.1126/sciadv.adf9705

**This PDF file includes:**

Tables S1 and S2  
Fig. S1

**Table S1: Comparison of Study Outcomes Pre to Post (Gains Scores) by Treatment Group**

|                           | Comparison |             |      |             |         |                 | Experimental |             |      |             |         |                 |
|---------------------------|------------|-------------|------|-------------|---------|-----------------|--------------|-------------|------|-------------|---------|-----------------|
|                           | Pre        |             | Post |             | Z       | Effect Size (r) | Pre          |             | Post |             | Z       | Effect Size (r) |
|                           | N          | Mean (SD)   | N    | Mean (SD)   |         |                 | N            | Mean (SD)   | N    | Mean (SD)   |         |                 |
| CDA Attitudes             | 84         | 3.47 (.691) | 63   | 3.77 (.567) | -4.21** | .530            | 108          | 3.39 (.735) | 80   | 3.88 (.737) | -5.36** | .599            |
| CDA Confidence            | 84         | 3.13 (.961) | 62   | 3.84 (.700) | -5.83** | .740            | 109          | 3.10 (.869) | 80   | 3.81 (.619) | -5.70** | .637            |
| Mentoring Skills (MCA)    | 62         | 4.49 (.793) | 62   | 5.43 (.694) | -6.62** | .841            | 84           | 4.43 (.836) | 84   | 5.33 (.832) | -7.77** | .848            |
| Mentoring Self-Efficacy   | 62         | 4.53 (1.02) | 62   | 5.74 (.828) | -6.50** | .826            | 82           | 4.44 (1.06) | 82   | 5.52 (1.08) | -6.83** | .754            |
| Overall Mentoring Quality | 61         | 4.64 (.797) | 61   | 5.80 (.726) | -6.52** | .835            | 82           | 4.44 (.904) | 82   | 5.51 (.906) | -7.60** | .839            |
| CAM Skills                | 60         | 3.68 (1.33) | 60   | 4.66 (1.17) | -6.17** | .797            | 80           | 3.47 (1.27) | 80   | 4.65 (1.11) | -7.11** | .795            |

3 Note. (1) Wilcoxon Signed-Rank Paired *t*-tests were used to test for difference in mean pre to post scores. \*\*Significant at the .01 level. CDA =  
4 Cultural Diversity Awareness; MCA = Mentoring Competency Assessment; CAM = Culturally Aware Mentoring.

**Table S2: Spearman Rank Correlations of Study Measures**

|                               | CDA Attitudes Gains | CDA Confidence Gains | CDA Behaviors | Mentoring Skills MCA Gains | Mentoring Self-Efficacy Gains | Overall Quality Gains | CAM Skill Gains |
|-------------------------------|---------------------|----------------------|---------------|----------------------------|-------------------------------|-----------------------|-----------------|
| CDA Attitudes Gains           |                     |                      |               |                            |                               |                       |                 |
| Pearson Correlation           | 1                   |                      |               |                            |                               |                       |                 |
| Sig. (2-tailed)               |                     |                      |               |                            |                               |                       |                 |
| N                             | 140                 |                      |               |                            |                               |                       |                 |
| CDA Confidence Gains          |                     |                      |               |                            |                               |                       |                 |
| Pearson Correlation           | .248**              | 1                    |               |                            |                               |                       |                 |
| Sig. (2-tailed)               | 0.003               |                      |               |                            |                               |                       |                 |
| N                             | 138                 | 140                  |               |                            |                               |                       |                 |
| CDA Behaviors                 |                     |                      |               |                            |                               |                       |                 |
| Pearson Correlation           | 0.074               | 0.066                | 1             |                            |                               |                       |                 |
| Sig. (2-tailed)               | 0.382               | 0.436                |               |                            |                               |                       |                 |
| N                             | 140                 | 140                  | 143           |                            |                               |                       |                 |
| Mentoring Skills MCA Gains    |                     |                      |               |                            |                               |                       |                 |
| Pearson Correlation           | 0.005               | -0.013               | 0.006         | 1                          |                               |                       |                 |
| Sig. (2-tailed)               | 0.955               | 0.894                | 0.947         |                            |                               |                       |                 |
| N                             | 113                 | 114                  | 115           | 146                        |                               |                       |                 |
| Mentoring Self-Efficacy Gains |                     |                      |               |                            |                               |                       |                 |
| Pearson Correlation           | -0.042              | 0.056                | 0.082         | .613**                     | 1                             |                       |                 |
| Sig. (2-tailed)               | 0.663               | 0.558                | 0.388         | 0                          | 0                             |                       |                 |
| N                             | 112                 | 113                  | 114           | 143                        | 144                           |                       |                 |
| Overall Quality Gains         |                     |                      |               |                            |                               |                       |                 |
| Pearson Correlation           | -0.089              | -0.041               | 0.137         | .670**                     | .769**                        | 1                     |                 |
| Sig. (2-tailed)               | 0.353               | 0.67                 | 0.149         | 0                          | 0                             | 0                     |                 |
| N                             | 111                 | 112                  | 113           | 142                        | 143                           | 143                   |                 |
| CAM Skill Gains               |                     |                      |               |                            |                               |                       |                 |
| Pearson Correlation           | 0.174               | 0.113                | -0.165        | .608**                     | .428**                        | .424**                | 1               |
| Sig. (2-tailed)               | 0.071               | 0.24                 | 0.084         | 0                          | 0                             | 0                     | 0               |
| N                             | 108                 | 109                  | 110           | 140                        | 140                           | 139                   | 140             |

\*\* Correlation is significant at the 0.01 level (2-tailed).

**Figure S1: Study Timeline**

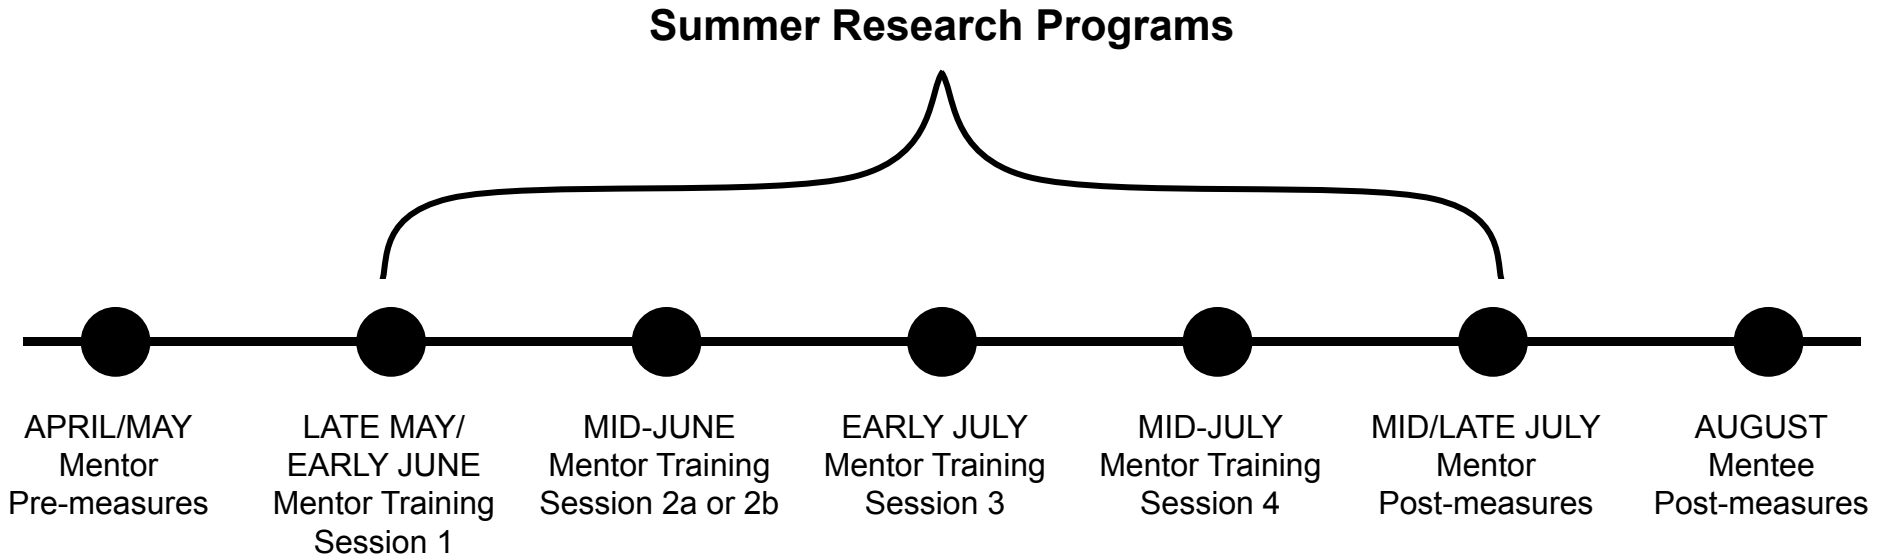

Supplement: sciadv.adf9705_sm.pdf [file sciadv.adf9705_sm.pdf]
